# Supplementary material for: Characteristics of dwellings contaminated by moulds
Source: Royal Society of Chemistry journal article supplement (doi:10.1039/b718909e), 2008-01-01
Supplement: b718909e.pdf [file b718909e.pdf]

**Table A:** Mean ratio (MR) and 95% confidence intervals (CI) as determined by weighted regression according to the month of sampling

| Variables         | N/128 | GM (GSD)      | MR   | 95% CI      | P value |
|-------------------|-------|---------------|------|-------------|---------|
| Month of sampling |       |               |      |             |         |
| January           | 19    | 229.87 (4.59) | Ref. |             |         |
| February          | 22    | 259.82 (3.46) | 1.13 | (0.56-2.30) | 0.74    |
| March             | 16    | 342.56 (1.80) | 1.49 | (0.69-3.22) | 0.31    |
| April             | 16    | 277.44 (0.69) | 1.21 | (0.56-2.61) | 0.63    |
| May               | 12    | 309.77 (0.28) | 1.35 | (0.58-3.11) | 0.49    |
| October           | 19    | 649.97 (2.39) | 2.83 | (1.35-5.89) | 0.006   |
| November          | 17    | 299.61 (0.71) | 1.30 | (0.61-2.78) | 0.49    |
| December          | 7     | 170.50 (0.19) | 0.74 | (0.27-2.02) | 0.56    |

N: number of answers out of 128 dwellings.

Ref.: reference category.

GM : geometric means

GSD : geometric standard deviation

**Table B:** Geometric means (GM), geometric standard deviation (GSD) for total concentration of fungi in the air, means ratio (MR) and 95% confidence intervals (CI) according to particular room characteristics.

| Variables                     |                   | N / 500 | GM (GSD)      | MR   | 95% IC      | P value |
|-------------------------------|-------------------|---------|---------------|------|-------------|---------|
| Sampled room                  | bathroom          | 128     | 302.80 (1.26) | Ref. |             |         |
|                               | kitchen           | 128     | 280.48 (1.21) | 0.93 | (0.69-1.24) | 0.60    |
|                               | bedroom           | 125     | 246.00 (1.18) | 0.81 | (0.61-1.09) | 0.17    |
|                               | living room       | 119     | 262.00 (1.25) | 0.87 | (0.65-1.17) | 0.35    |
| Volume                        | In m <sup>3</sup> | 238     | -             | 1.00 | (0.99-1.00) | 0.40    |
| Washing put to dry            | yes               | 61      | 330.97 (1.38) | Ref. |             | 0.10    |
|                               | no                | 435     | 260.91 (1.16) | 0.77 | (0.56-1.05) |         |
| Presence of a washing machine | yes               | 73      | 331.34 (1.18) | Ref. |             |         |
|                               | no                | 419     | 257.57 (1.20) | 0.80 | (0.60-1.09) | 0.22    |
| Windows                       | yes               | 440     | 265.27 (1.21) | Ref. |             |         |
|                               | no                | 58      | 337.55 (1.35) | 1.29 | (0.93-1.79) | 0.12    |
| Air vents                     | yes               | 141     | 242.67 (1.21) | Ref. |             |         |
|                               | no                | 356     | 287.39 (1.22) | 1.15 | (0.92-1.46) | 0.89    |
| Time of airing per day        | Min/day           | 414     | -             | 0.20 | (0.02-2.11) | 0.60    |
| Floor covering                | tiles             | 190     | 268.80 (1.14) | Ref. |             |         |
|                               | linoleum          | 191     | 272.69 (1.32) | 0.98 | (0.77-1.26) | 0.90    |
|                               | carpet            | 15      | 295.45 (1.04) | 1.04 | (0.56-1.95) | 0.90    |
|                               | wooden floor      | 84      | 286.56 (1.31) | 1.03 | (0.76-1.40) | 0.85    |
|                               | other             | 11      | 196.47 (1.71) | 0.58 | (0.28-1.21) | 0.15    |
| Presence of plants            | yes               | 61      | 230.07 (0.84) | Ref. |             |         |
|                               | no                | 438     | 278.85 (1.27) | 1.16 | (0.84-1.60) | 0.37    |

N : number of answers out of 500 rooms.

Ref.: reference category.
